# Supplementary material for: Specialization restricts the evolutionary paths available to yeast sugar transporters
Source: PubMed Central journal article supplement — bioRxiv. 2024 Jul 23:2024.07.22.604696. Preprint. [Version 1] doi: 10.1101/2024.07.22.604696 (PMC11291069; doi:10.1101/2024.07.22.604696), 2024-07-23
Supplement: media-1.pdf [file media-1.pdf]

1

## SUPPLEMENTAL FIGURES

2

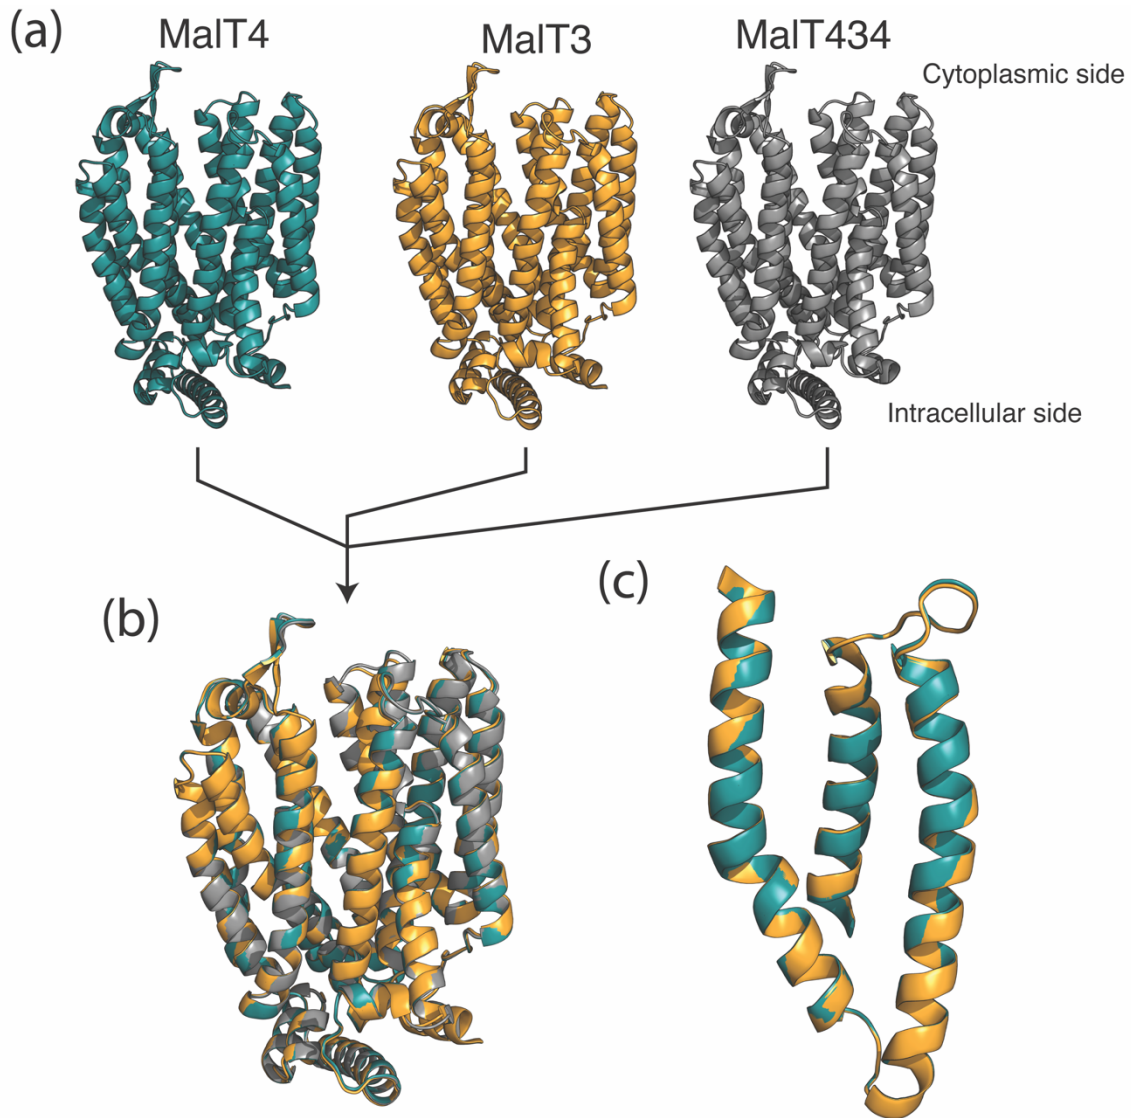

3 **Figure S1.** Structural similarity of wild-type and chimeric *S. eubayanus* transporters. (a)

4 Structural models for wild-type MaltT4 (teal) and MaltT3 (orange), and the chimeric

5 MaltT434 (gray) are shown with intracellular N- and C-terminal domains hidden for

6 clarity. (b) Structural overlay of MaltT3, MaltT4, and MaltT434. The structures are

- 7 superimposable with mean and SD pairwise RMSD= $0.955\pm 0.107\text{\AA}$ . (c) Structural overlay
- 8 of transmembrane helices 10, 11, and 12 from MalT3 and MalT4, corresponding to the
- 9 recombinant region in MalT434 (RMSD= $0.909\text{\AA}$ ).

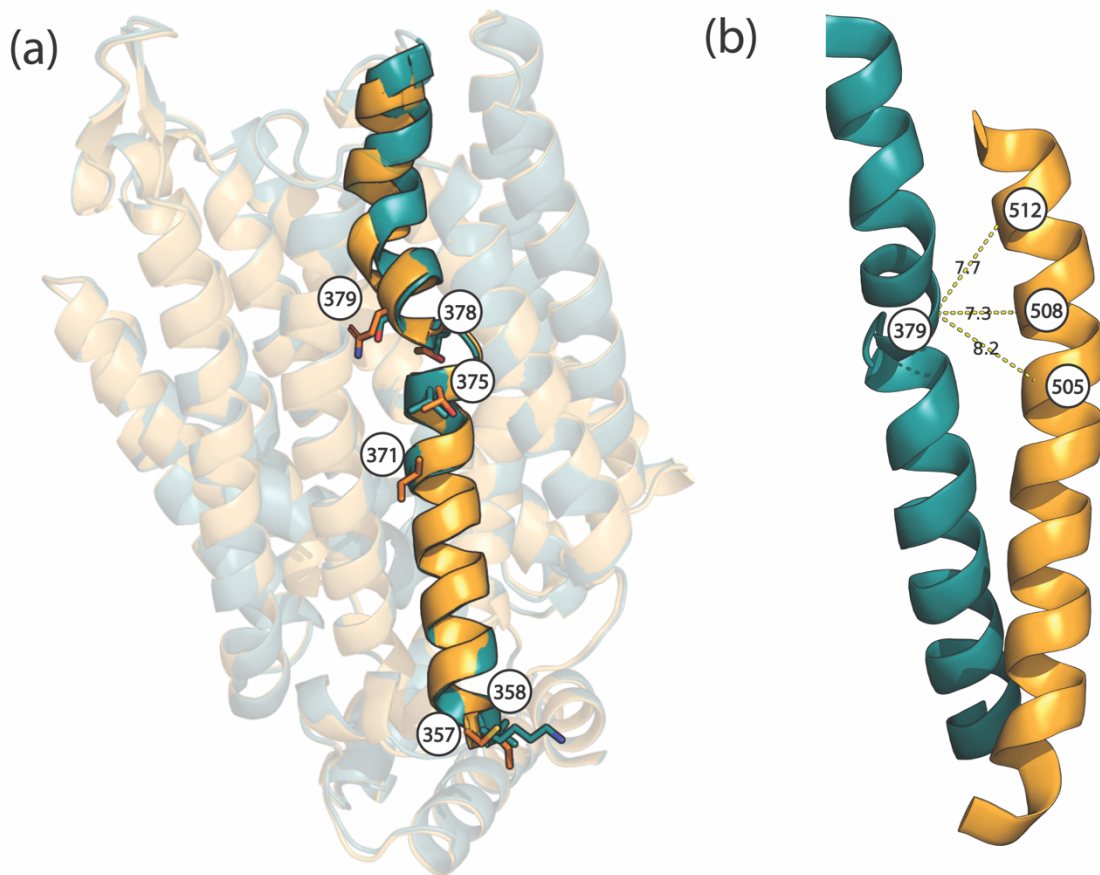

10

11 **Figure S2.** Amino acid differences between Malt3 and Malt4 along the key  
 12 transmembrane helix 7. (a) The structural models of Malt4 (teal) and Malt3 (orange) are  
 13 superimposed; transmembrane helix 7 is shown in full color, while all other  
 14 transmembrane helices and the ICH domain are shown with transparency, and the  
 15 intracellular N- and C-terminal domains are hidden. Side chains are drawn at the sites  
 16 where Malt4 and Malt3 differ along TMH 7, with residue numbers labeled. (b) Detail of  
 17 the proximity between position 379 on TMH 7 and sites on TMH 11. Helices are shown  
 18 from the structural model of the chimeric transporter Malt434 and colored according to

19 parental protein (TMH 7, MalT4, teal; TMH 11, MalT3, orange). Dotted lines and labels  
20 show the distance between residues 379 and 505, 508, and 512 (bottom to top,  
21 respectively), in angstroms.

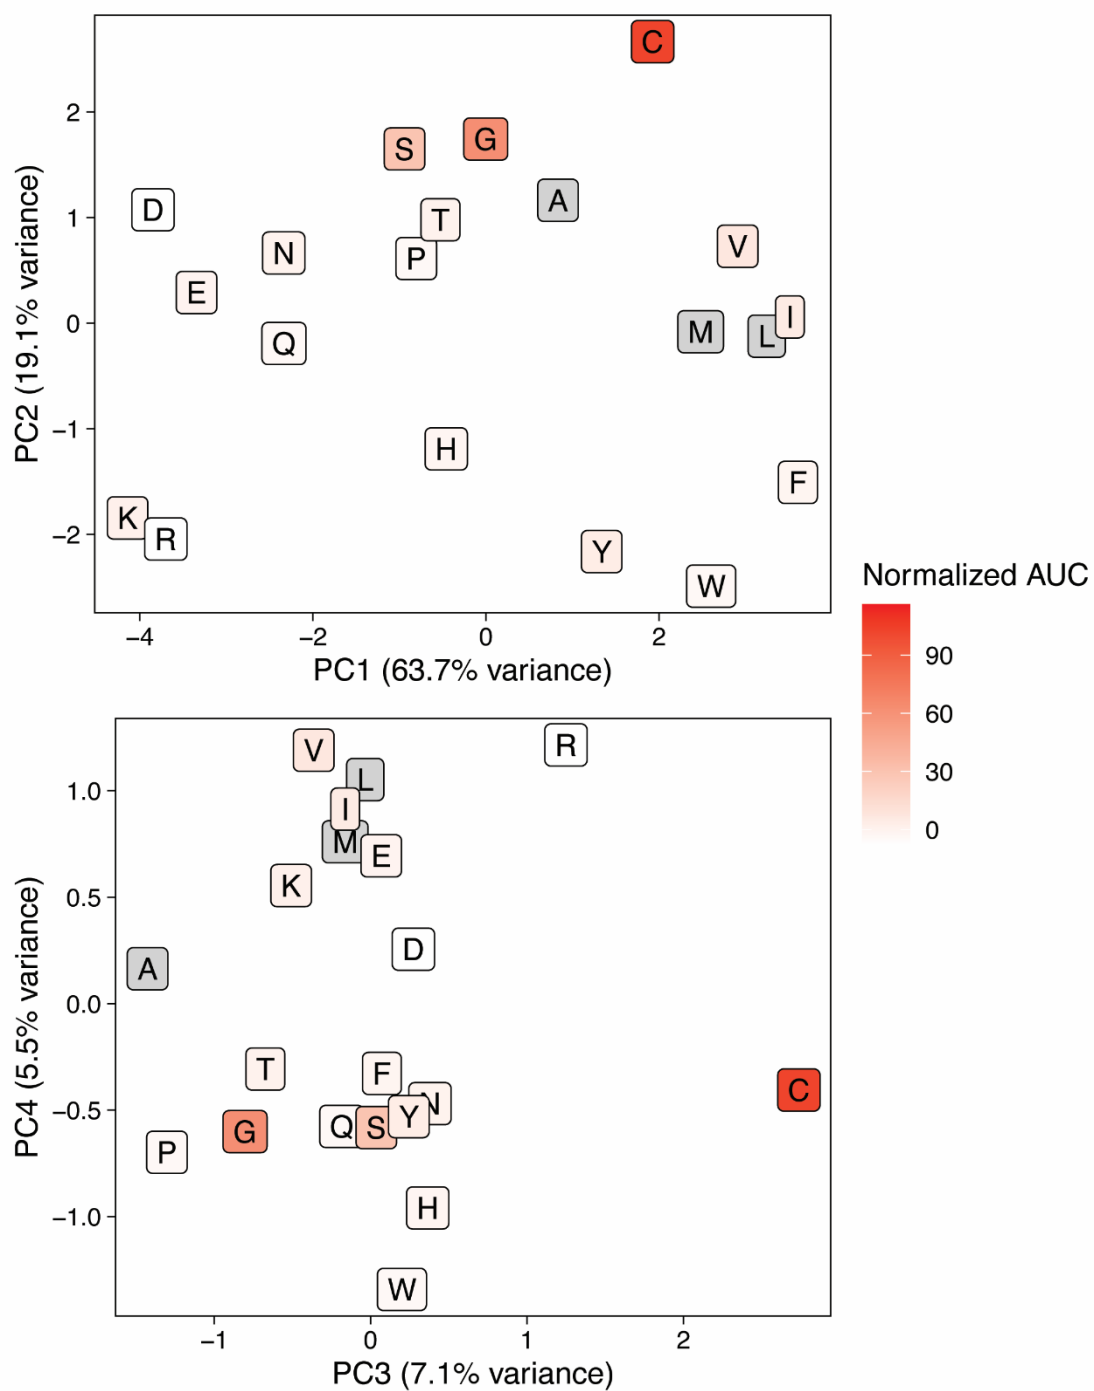

22

23 **Figure S3.** The effect of residue C505 on maltotriose transport is due to its unique

24 properties. Scatterplots show amino acids in principal component space based on

25 dimensionality reduction of side chain properties. Colors show growth on maltotriose  
26 (AUC, area under the curve) of strains expressing MalT4 with the given amino acid at  
27 position 505, in the context of all other necessary mutations for maltotriose transport,  
28 as shown in Fig. 5. Amino acids in gray were not measured.

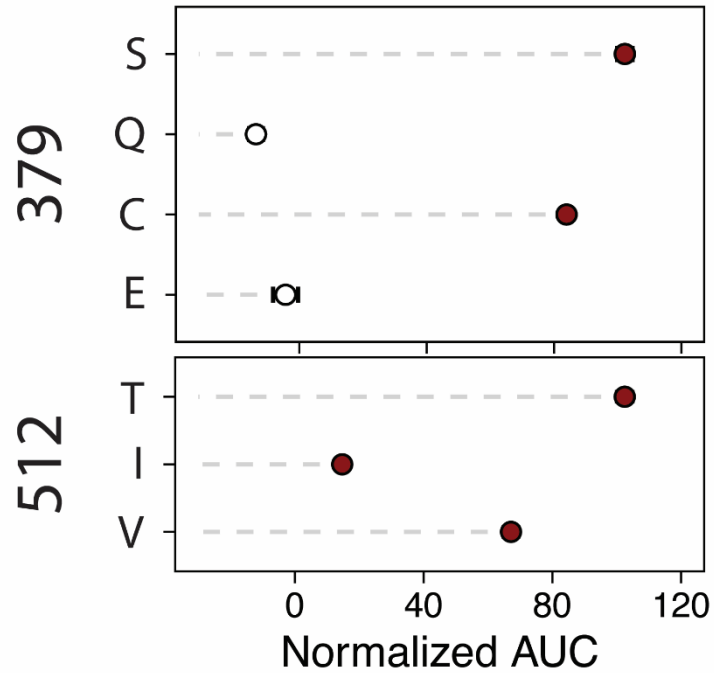

29

30 **Figure S4.** Further evidence for nuanced and context-specific biochemical requirements  
 31 at key sites. Points and bars show mean +/- SEM of normalized growth on maltotriose  
 32 (AUC, area under the curve) of strains expressing MalT4 variants which each contain all  
 33 other necessary mutations for maltotriose transport. The amino acid identity at position  
 34 379 (top panel) or 512 (bottom panel) is shown on the x-axis. Filled circles denote  
 35 growth significantly greater than the negative control ( $p < 0.01$ , Mann-Whitney  $U$  test  
 36 with Benjamini-Hochberg correction).

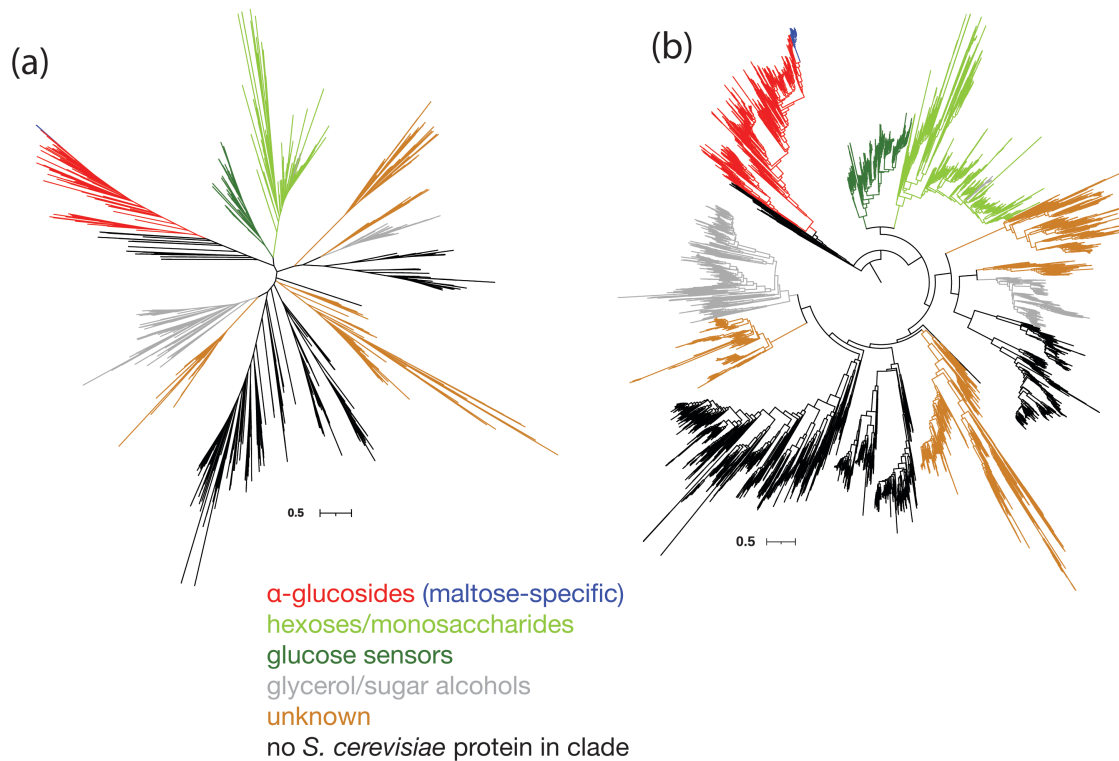

37

38 **Figure S5.** Unrooted (a) and midpoint-rooted (b) maximum-likelihood phylogeny of  
 39 8,403 sugar porters from 332 budding yeast genomes. An outgroup clade containing  
 40 non-sugar porter Major Facilitator Superfamily proteins is hidden for clarity; rooting the  
 41 tree to this outgroup recovers the same topology. Major clades containing at least one  
 42 *S. cerevisiae* protein are colored according to the substrate(s) of the *S. cerevisiae*  
 43 homolog:  $\alpha$ -glucosides (red and blue), hexoses/monosaccharides (light green), glucose  
 44 sensors (dark green), glycerol/sugar alcohols (gray), and undetermined (orange). The  
 45 high-specificity maltose transporter clade, which contains the *Saccharomyces*-specific  
 46 Mph2/3 proteins, is shown in blue. The Newick-formatted tree is available in Data S1.



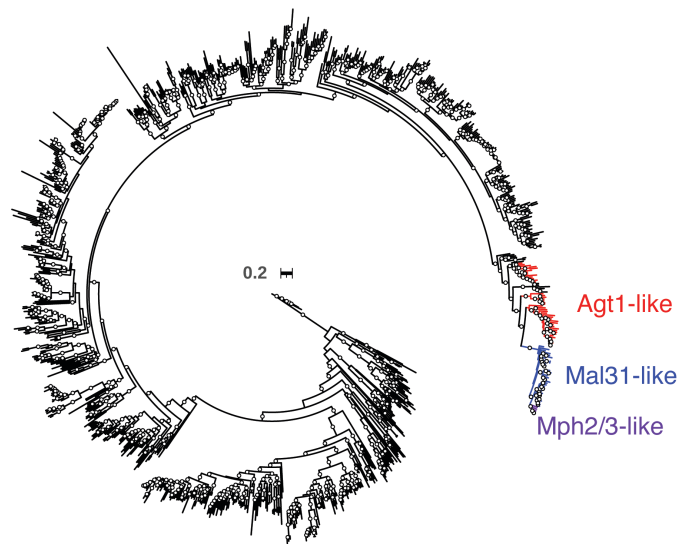

47

48 **Figure S6.** Maximum-likelihood phylogeny of the clade containing  $\alpha$ -glucoside  
 49 transporters, rooted to a divergent outgroup. Agt1- and Mal31-like transporters from  
 50 Saccharomycetales are colored in red and blue, respectively, with the *Saccharomyces*-  
 51 specific Mph2/3 clade in purple. Circles denote branches with >90% bootstrap support.  
 52 The Newick-formatted tree is available in Data S3.

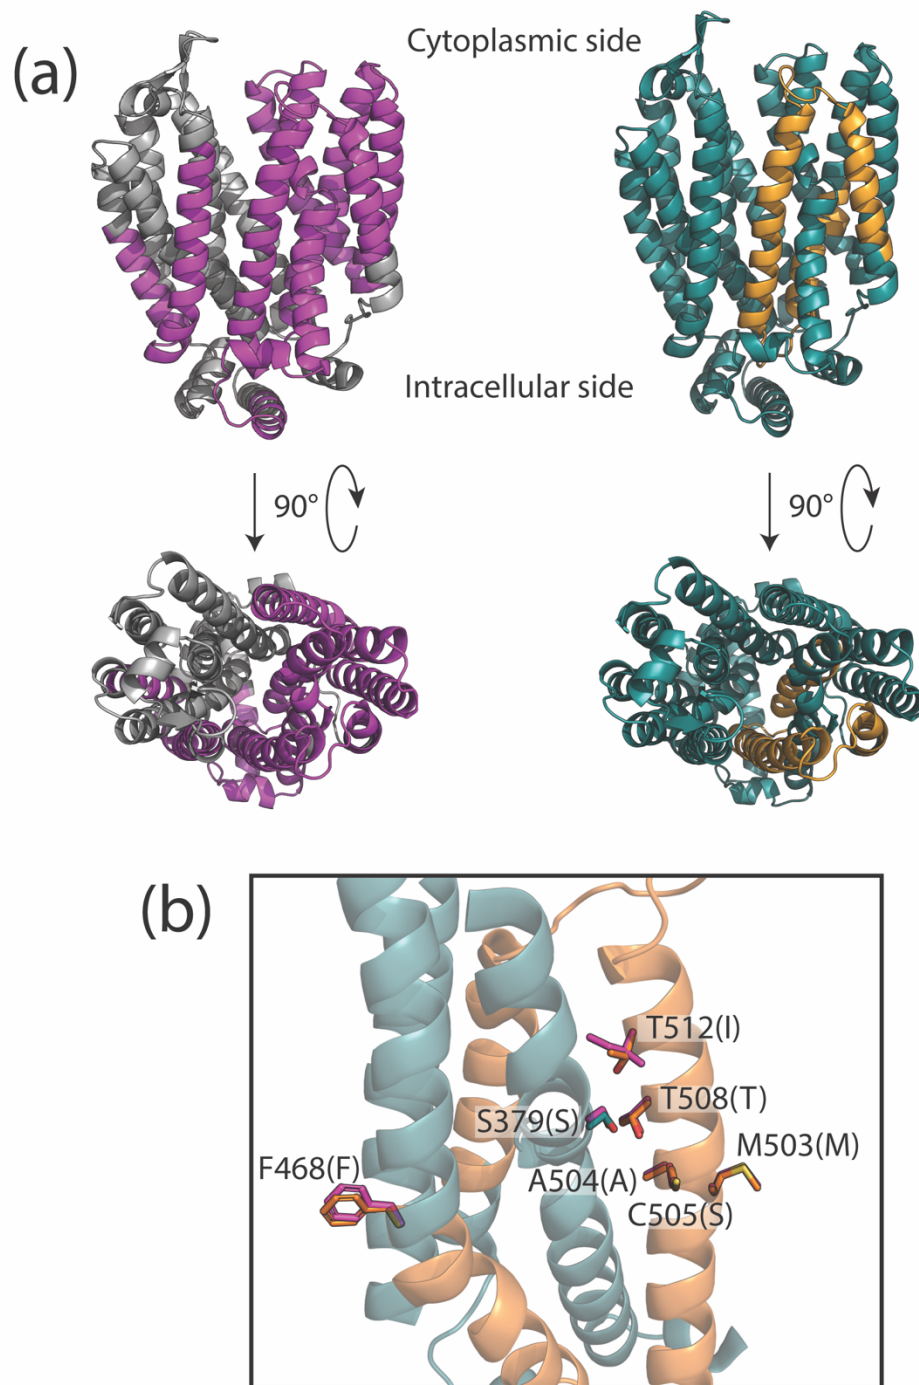

53

54 **Figure S7.** Similarity of chimeric maltotriose transporters. (a) Structural models for Mty1

55 (left, gray and pink) MalT434 (right, teal and orange) and are shown from side-on (top

56 row) and top-down (bottom row) views. Intracellular N- and C-terminal domains are  
57 hidden for clarity. On each structure the contrasting colors denote regions from  
58 different parental proteins (i.e. chimeric breakpoints). The two models are  
59 superimposable with RMSD=0.898Å. (b) Detail of amino acid similarity between  
60 MalT434 and Mty1. The structural model of MalT434 is shown, with a focus on the C-  
61 terminal helical bundle as viewed from the transport channel. N-terminal helices are  
62 hidden for clarity. Side chains are drawn for residues in MalT434 that were determined  
63 to have an effect on maltotriose transport in molecular experiments, colored according  
64 to their parental protein identity (MalT4, teal; MalT3, orange). Side chains are drawn in  
65 pink for the corresponding residues in the aligned structural model of Mty1, which is  
66 hidden for clarity; the amino acid identity for Mty1 is in parentheses.

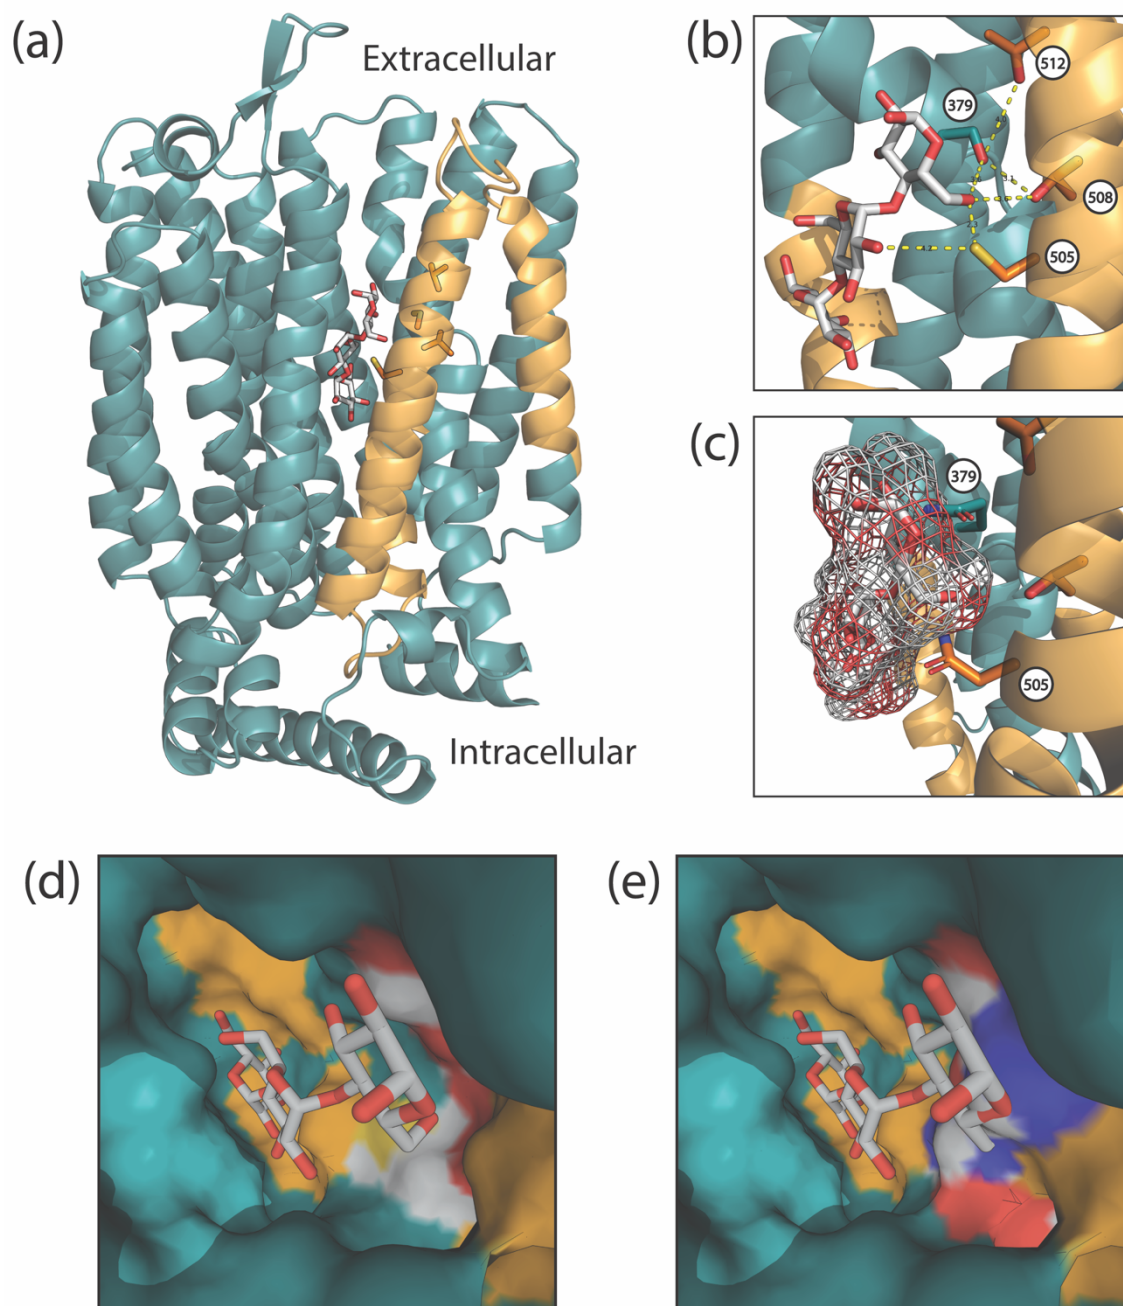

67

68 **Figure S8.** (a) A side view of the structural model of MaltT434 is shown with side chains

69 drawn at residues 379, 505, 508, and 512. Docked maltotriose is drawn as sticks and

70 colored by element. (b) Details of proximities and potential interactions between key

71 residues and maltotriose. The structural model with docked ligand is shown as in (a),  
72 with obscuring helices hidden. Dotted lines show distances in angstroms between  
73 maltotriose and key residues with a functional impact on maltotriose transport that  
74 could engage in a hydrogen-bonding network. (c) Residues Q379 and N505 could inhibit  
75 sugar transport by occlusion. Maltotriose docked to the structural model of MalT434 is  
76 shown as in (b) with a mesh surface drawn for the sugar. Side chains are drawn for  
77 residues S379 and N505, both of which could inhibit the accommodation of the large  
78 maltotriose molecule. (d-e) Docked maltotriose in the space-filling model of MalT434.  
79 The surface is colored by MalT3/MalT4 identity, except for at residues 379, 505, 508,  
80 and 512, which are colored by element. In (e), the residues at these positions have been  
81 reverted to their MalT3 (379) or MalT4 (505, 508, 512) identity, which substantially  
82 reduces the volume of the substrate pocket and introduces steric clashes with the sugar.

Fig. S9

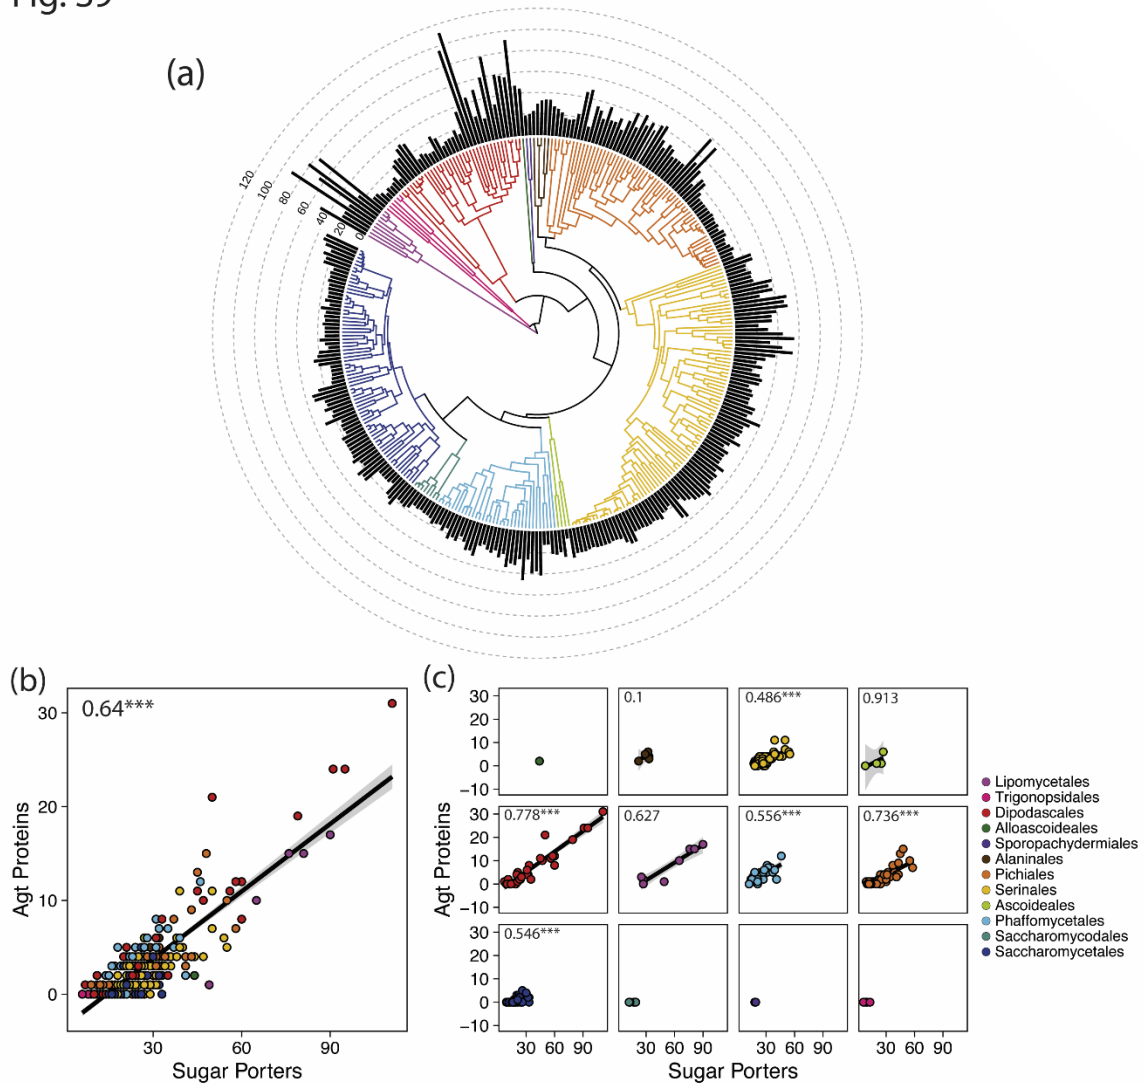

83

84 **Figure S9.** Expanded sets of Agt proteins are generally representative of genome-wide  
85 sugar porter complement. (a) Time-calibrated Saccharomycotina species phylogeny, as  
86 in Fig. 7, with branches colored by order. The bar chart shows the total number of sugar  
87 porters in each genome. (b) Scatterplot of all sugar porters versus Agt proteins encoded  
88 in each genome. Each species is a point, colored by taxonomic order. Inset text gives

89 Kendall's T ( $p < 2.2 \times 10^{-16}$ ). (c) Scatterplots as in (b), split by taxonomic order. Inset text  
90 gives within-order Kendall's T ( $***p < 1.3 \times 10^{-5}$ ). Correlation coefficients were not  
91 calculated for orders with too few species in our dataset. Lines and shaded regions in (b)  
92 and (c) show simple linear regressions and 95% confidence intervals of untransformed  
93 data.

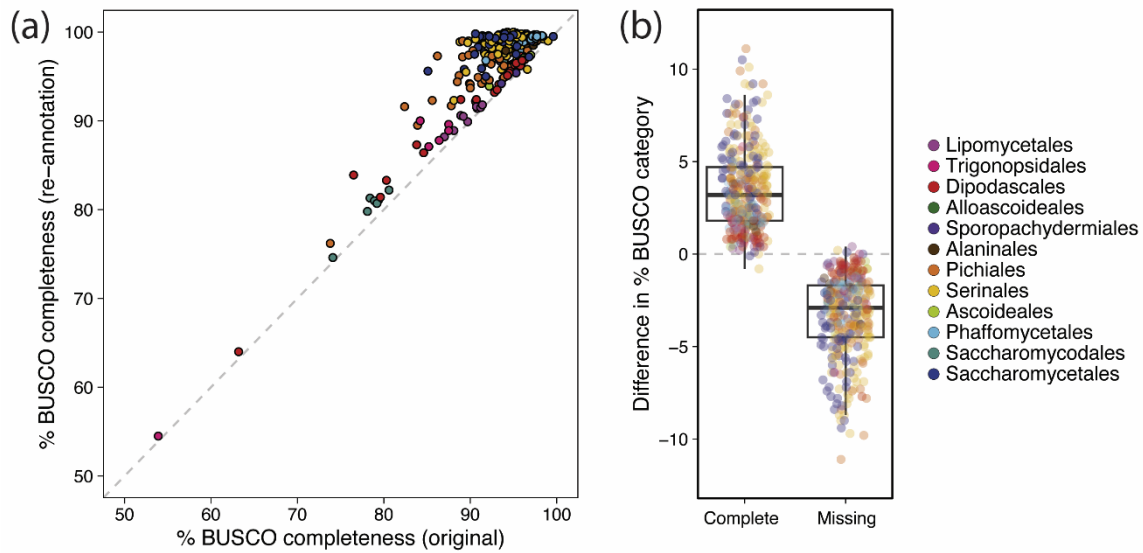

94

95 **Figure S10.** Improvement in annotation quality for 332 Saccharomycotina genomes. (a)

96 Scatterplot of annotation completeness (% of Benchmark Universal Single-Copy

97 Orthologs/BUSCO present in single, complete copy in annotation) for the 332

98 Saccharomycotina genomes used in this study (Shen et al. 2018). Completeness for

99 previous annotations is on the x-axis, and completeness for new annotations from the

100 current work are plotted against the y-axis. The dotted gray line shows the 1:1 null

101 expectation of no improvement. (b) Difference in the percentage of complete and

102 missing BUSCO for annotations from the current study compared to previous

103 annotations. Boxplots show median and interquartile ranges; individual genomes are

104 plotted as points. Points in both panels are colored by taxonomic order.



105

## REFERENCES

106 Shen X-X, Opulente DA, Kominek J, Zhou X, Steenwyk JL, Buh K V., Haase MAB,  
107 Wisecaver JH, Wang M, Doering DT, et al. 2018. Tempo and Mode of Genome  
108 Evolution in the Budding Yeast Subphylum. *Cell* [Internet] 175:1533-1545.e20.  
109 Available from: <https://linkinghub.elsevier.com/retrieve/pii/S0092867418313321>  
110
